# Supplementary material for: An Experiment on the Use of Genetic Algorithms for Topology Selection in Deep Learning
Source: Hindawi journal article supplement (doi:10.1155/2019/3217542), 2019-01-15
Supplement: f1 [file 3217542.f1.zip]

Archive with 71 entries (62 files):
- 3217542.f1/ga-dnn-cifar10/
- 3217542.f1/ga-dnn-cifar10/.settings/
- 3217542.f1/ga-dnn-cifar10/.settings/language.settings.xml
- 3217542.f1/ga-dnn-cifar10/db/
- 3217542.f1/ga-dnn-cifar10/db/db-sqlite.sql
- 3217542.f1/ga-dnn-cifar10/Makefile
- 3217542.f1/ga-dnn-cifar10/src/
- 3217542.f1/ga-dnn-cifar10/src/ann-config.h
- 3217542.f1/ga-dnn-cifar10/src/cifar10-classifier.cpp
- 3217542.f1/ga-dnn-cifar10/src/cifar10-classifier.h
- 3217542.f1/ga-dnn-cifar10/src/cifar10-data-wrapper.cpp
- 3217542.f1/ga-dnn-cifar10/src/cifar10-data-wrapper.h
- 3217542.f1/ga-dnn-cifar10/src/classifier.h
- 3217542.f1/ga-dnn-cifar10/src/data-wrapper.h
- 3217542.f1/ga-dnn-cifar10/src/db-handler.cpp
- 3217542.f1/ga-dnn-cifar10/src/db-handler.h
- 3217542.f1/ga-dnn-cifar10/src/descriptors.cpp
- 3217542.f1/ga-dnn-cifar10/src/descriptors.h
- 3217542.f1/ga-dnn-cifar10/src/fitness-data-wrapper.cpp
- 3217542.f1/ga-dnn-cifar10/src/fitness-data-wrapper.h
- 3217542.f1/ga-dnn-cifar10/src/fitness-regressor.cpp
- 3217542.f1/ga-dnn-cifar10/src/fitness-regressor.h
- 3217542.f1/ga-dnn-cifar10/src/main.cpp
- 3217542.f1/ga-dnn-cifar10/src/population.cpp
- 3217542.f1/ga-dnn-cifar10/src/population.h
- 3217542.f1/ga-dnn-cifar10/src/regressor.h
- 3217542.f1/ga-dnn-cifar10/src/selector.cpp
- 3217542.f1/ga-dnn-cifar10/src/selector.h
- 3217542.f1/ga-dnn-cifar10/src/solution.cpp
- 3217542.f1/ga-dnn-cifar10/src/solution.h
- 3217542.f1/ga-dnn-cifar10/src/utils.cpp
- 3217542.f1/ga-dnn-cifar10/src/utils.h
- 3217542.f1/ga-dnn-mnist/
- 3217542.f1/ga-dnn-mnist/.settings/
- 3217542.f1/ga-dnn-mnist/.settings/language.settings.xml
- 3217542.f1/ga-dnn-mnist/db/
- 3217542.f1/ga-dnn-mnist/db/db.sql
- 3217542.f1/ga-dnn-mnist/Makefile
- 3217542.f1/ga-dnn-mnist/src/
- 3217542.f1/ga-dnn-mnist/src/ann-config.h
- 3217542.f1/ga-dnn-mnist/src/classifier.h
- 3217542.f1/ga-dnn-mnist/src/data-wrapper.h
- 3217542.f1/ga-dnn-mnist/src/db-handler.cpp
- 3217542.f1/ga-dnn-mnist/src/db-handler.h
- 3217542.f1/ga-dnn-mnist/src/descriptors.cpp
- 3217542.f1/ga-dnn-mnist/src/descriptors.h
- 3217542.f1/ga-dnn-mnist/src/fitness-data-wrapper.cpp
- 3217542.f1/ga-dnn-mnist/src/fitness-data-wrapper.h
- 3217542.f1/ga-dnn-mnist/src/fitness-regressor.cpp
- 3217542.f1/ga-dnn-mnist/src/fitness-regressor.h
- 3217542.f1/ga-dnn-mnist/src/main.cpp
- 3217542.f1/ga-dnn-mnist/src/mnist-classifier.cpp
- 3217542.f1/ga-dnn-mnist/src/mnist-classifier.h
- 3217542.f1/ga-dnn-mnist/src/mnist-data-wrapper.cpp
- 3217542.f1/ga-dnn-mnist/src/mnist-data-wrapper.h
- 3217542.f1/ga-dnn-mnist/src/population.cpp
- 3217542.f1/ga-dnn-mnist/src/population.h
- 3217542.f1/ga-dnn-mnist/src/regressor.h
- 3217542.f1/ga-dnn-mnist/src/selector.cpp
- 3217542.f1/ga-dnn-mnist/src/selector.h
- 3217542.f1/ga-dnn-mnist/src/solution.cpp
- 3217542.f1/ga-dnn-mnist/src/solution.h
- 3217542.f1/ga-dnn-mnist/src/test/
- 3217542.f1/ga-dnn-mnist/src/test/descriptors-test.cpp
- 3217542.f1/ga-dnn-mnist/src/test/main-test.cpp
- 3217542.f1/ga-dnn-mnist/src/test/mnist-classifier-test.cpp
- 3217542.f1/ga-dnn-mnist/src/test/mnist-data-wrapper-test.cpp
- 3217542.f1/ga-dnn-mnist/src/test/population-test.cpp
- 3217542.f1/ga-dnn-mnist/src/test/solution-test.cpp
- 3217542.f1/ga-dnn-mnist/src/utils.cpp
- 3217542.f1/ga-dnn-mnist/src/utils.h
