# Supplementary material for: An Experiment on the Use of Genetic Algorithms for Topology Selection in Deep Learning
Source: Hindawi journal article supplement (doi:10.1155/2019/3217542), 2019-01-15
Supplement: f1 [file 3217542.f1.zip › 3217542.f1/ga-dnn-cifar10/.settings/language.settings.xml]

<?xml version="1.0" encoding="UTF-8" standalone="no"?>
<project>
	<configuration id="cdt.managedbuild.toolchain.gnu.base.1683070949" name="Default">
		<extension point="org.eclipse.cdt.core.LanguageSettingsProvider">
			<provider copy-of="extension" id="org.eclipse.cdt.ui.UserLanguageSettingsProvider"/>
			<provider-reference id="org.eclipse.cdt.core.ReferencedProjectsLanguageSettingsProvider" ref="shared-provider"/>
			<provider copy-of="extension" id="org.eclipse.cdt.managedbuilder.core.GCCBuildCommandParser"/>
			<provider class="org.eclipse.cdt.managedbuilder.language.settings.providers.GCCBuiltinSpecsDetector" console="false" env-hash="-1646682057182312858" id="org.eclipse.cdt.managedbuilder.core.GCCBuiltinSpecsDetector" keep-relative-paths="false" name="CDT GCC Built-in Compiler Settings" parameter="${COMMAND} ${FLAGS} -E -P -v -dD &quot;${INPUTS}&quot;" prefer-non-shared="true">
				<language-scope id="org.eclipse.cdt.core.gcc"/>
				<language-scope id="org.eclipse.cdt.core.g++"/>
			</provider>
			<provider-reference id="org.eclipse.cdt.managedbuilder.core.MBSLanguageSettingsProvider" ref="shared-provider"/>
		</extension>
	</configuration>
	<configuration id="cdt.managedbuild.toolchain.gnu.base.1683070949.1890812778" name="Tests">
		<extension point="org.eclipse.cdt.core.LanguageSettingsProvider">
			<provider copy-of="extension" id="org.eclipse.cdt.ui.UserLanguageSettingsProvider"/>
			<provider-reference id="org.eclipse.cdt.core.ReferencedProjectsLanguageSettingsProvider" ref="shared-provider"/>
			<provider copy-of="extension" id="org.eclipse.cdt.managedbuilder.core.GCCBuildCommandParser"/>
			<provider class="org.eclipse.cdt.managedbuilder.language.settings.providers.GCCBuiltinSpecsDetector" console="false" env-hash="-1646682057182312858" id="org.eclipse.cdt.managedbuilder.core.GCCBuiltinSpecsDetector" keep-relative-paths="false" name="CDT GCC Built-in Compiler Settings" parameter="${COMMAND} ${FLAGS} -E -P -v -dD &quot;${INPUTS}&quot;" prefer-non-shared="true">
				<language-scope id="org.eclipse.cdt.core.gcc"/>
				<language-scope id="org.eclipse.cdt.core.g++"/>
			</provider>
			<provider-reference id="org.eclipse.cdt.managedbuilder.core.MBSLanguageSettingsProvider" ref="shared-provider"/>
		</extension>
	</configuration>
</project>
