# Supplementary material for: An Experiment on the Use of Genetic Algorithms for Topology Selection in Deep Learning
Source: Hindawi journal article supplement (doi:10.1155/2019/3217542), 2019-01-15
Supplement: f1 [file 3217542.f1.zip › 3217542.f1/ga-dnn-cifar10/db/db-sqlite.sql]

CREATE TABLE IF NOT EXISTS fitness_patterns_cifar10 (
    id INTEGER PRIMARY KEY AUTOINCREMENT,
    descriptor varchar(200) UNIQUE NOT NULL,
    training_input varchar(300),
    train_acc float NOT NULL,
    test_acc float NOT NULL,
    n_weights bigint NOT NULL,
    pareto_front boolean NOT NULL DEFAULT FALSE
);


CREATE TABLE IF NOT EXISTS random_log (
    id INTEGER PRIMARY KEY AUTOINCREMENT,
    descriptor text NOT NULL,
    train_acc float NOT NULL,
    test_acc float NOT NULL,
    weights bigint NOT NULL,
    predicted boolean NOT NULL DEFAULT FALSE
);


CREATE TABLE IF NOT EXISTS grid_log (
    id INTEGER PRIMARY KEY AUTOINCREMENT,
    descriptor text NOT NULL,
    train_acc float NOT NULL,
    test_acc float NOT NULL,
    weights bigint NOT NULL,
    predicted boolean NOT NULL DEFAULT FALSE
);


CREATE TABLE IF NOT EXISTS ga_log (
    id INTEGER PRIMARY KEY AUTOINCREMENT,
    descriptor text NOT NULL,
    generation integer NOT NULL,
    train_acc float NOT NULL,
    test_acc float NOT NULL,
    weights bigint NOT NULL,
    predicted boolean NOT NULL DEFAULT FALSE
);


CREATE TABLE IF NOT EXISTS ga_predictor_log (
    id INTEGER PRIMARY KEY AUTOINCREMENT,
    descriptor text NOT NULL,
    generation integer NOT NULL,
    train_acc float NOT NULL,
    test_acc float NOT NULL,
    weights bigint NOT NULL,
    predicted boolean NOT NULL DEFAULT FALSE
);
