# Supplementary material for: An Experiment on the Use of Genetic Algorithms for Topology Selection in Deep Learning
Source: Hindawi journal article supplement (doi:10.1155/2019/3217542), 2019-01-15
Supplement: f1 [file 3217542.f1.zip › 3217542.f1/ga-dnn-cifar10/src/selector.h]

#ifndef SELECTOR_HPP_
#define SELECTOR_HPP_

#include <vector>
#include "solution.h"

class Selector {
public:
	Selector();

	virtual ~Selector();

	Solution roulette_select(vector<Solution>& population);

	Solution inverted_roulette_select(vector<Solution>& population);

};

#endif
