# Supplementary material for: An Experiment on the Use of Genetic Algorithms for Topology Selection in Deep Learning
Source: Hindawi journal article supplement (doi:10.1155/2019/3217542), 2019-01-15
Supplement: f1 [file 3217542.f1.zip › 3217542.f1/ga-dnn-cifar10/src/utils.h]

#ifndef UTILS_H_
#define UTILS_H_

#include <stdio.h>
#include <string.h>
#include <stdlib.h>

/* Utility functions */
int get_memory_usage();

#endif
