# Supplementary material for: An Experiment on the Use of Genetic Algorithms for Topology Selection in Deep Learning
Source: Hindawi journal article supplement (doi:10.1155/2019/3217542), 2019-01-15
Supplement: f1 [file 3217542.f1.zip › 3217542.f1/ga-dnn-mnist/db/db.sql]

CREATE DATABASE ga_dnn;

CREATE TABLE fitness_patterns (
	id SERIAL PRIMARY KEY,
	descriptor varchar(200) UNIQUE NOT NULL,
	training_input varchar(300) UNIQUE NOT NULL,
	fitness float NOT NULL,
	n_weights bigint NOT NULL
);

CREATE TABLE IF NOT EXISTS fitness_patterns_mnist (
    id SERIAL PRIMARY KEY,
    descriptor varchar(200) UNIQUE NOT NULL,
    training_input varchar(300),
    fitness float NOT NULL,
    n_weights bigint NOT NULL,
    pareto_front boolean NOT NULL DEFAULT FALSE
);
