# Supplementary material for: An Experiment on the Use of Genetic Algorithms for Topology Selection in Deep Learning
Source: Hindawi journal article supplement (doi:10.1155/2019/3217542), 2019-01-15
Supplement: f1 [file 3217542.f1.zip › 3217542.f1/ga-dnn-mnist/src/db-handler.cpp]

#include "db-handler.h"

using namespace std;

DbHandler::DbHandler() {}


DbHandler::~DbHandler() {}

/*
 * Queries the database for previously evaluated model.
 * Returns the stored fitness and weights (if found) or -1 (if not found)
 */
FitnessRecord DbHandler::get_by_descriptor(const string& descriptor) const {
	pqxx::connection c(CONN_STRING);
	pqxx::work txn{c};

	pqxx::result r = txn.exec(
			"SELECT id, descriptor, training_input, fitness, n_weights "
			"FROM fitness_patterns_mnist "
			"WHERE descriptor = " + txn.quote(descriptor));

	txn.commit();

	FitnessRecord fr;

	if (r.empty()) {
		fr.fitness = -1;
		fr.n_weights = -1;
	} else {
		fr.id = r[0]["id"].as<int>();
		fr.descriptor = r[0]["descriptor"].as<string>();
		fr.training_input = r[0]["training_input"].as<string>();
		fr.fitness = r[0]["fitness"].as<float>();
		fr.n_weights = r[0]["n_weights"].as<long>();
	}

	return fr;

}


void DbHandler::insert(const FitnessRecord& fr) const {

	pqxx::connection c(CONN_STRING);
	pqxx::work txn{c};

	pqxx::result r = txn.exec(
			"INSERT INTO fitness_patterns_mnist (descriptor, training_input, fitness, n_weights) "
			"VALUES (" + txn.quote(fr.descriptor) + ", " + txn.quote(fr.training_input) + ", " + txn.quote(fr.fitness) +
				", " + txn.quote(fr.n_weights) + ")");

	txn.commit();

}


vector<FitnessRecord> DbHandler::get_all() const {

	pqxx::connection c(CONN_STRING);
	pqxx::work txn{c};

	pqxx::result r = txn.exec(
			"SELECT id, descriptor, training_input, fitness, n_weights "
			"FROM fitness_patterns_mnist");

	txn.commit();

	vector<FitnessRecord> records;

	for (unsigned int i = 0; i < r.size(); ++i) {
		FitnessRecord fr;

		fr.id			  = r[i]["id"].as<int>();
		fr.descriptor 	  =	r[i]["descriptor"].as<string>();
		fr.training_input = r[i]["training_input"].as<string>();
		fr.fitness 		  =	r[i]["fitness"].as<float>();
		fr.n_weights 	  =	r[i]["n_weights"].as<long>();

		records.push_back(fr);

	}

	return records;

}


vector<FitnessRecord> DbHandler::get_pareto_front() const {

	pqxx::connection c(CONN_STRING);
	pqxx::work txn{c};

	pqxx::result r = txn.exec(
			"SELECT id, descriptor, training_input, fitness, n_weights "
			"FROM fitness_patterns_mnist "
			"WHERE pareto_front = TRUE");

	txn.commit();

	vector<FitnessRecord> records;

	for (unsigned int i = 0; i < r.size(); ++i) {
		FitnessRecord fr;

		fr.id			  = r[i]["id"].as<int>();
		fr.descriptor 	  =	r[i]["descriptor"].as<string>();
		fr.training_input = r[i]["training_input"].as<string>();
		fr.fitness 		  =	r[i]["fitness"].as<float>();
		fr.n_weights 	  =	r[i]["n_weights"].as<long>();

		records.push_back(fr);

	}

	return records;

}


/*
 * Clear fitness records from previous executions
 */
void DbHandler::clear() const {
	pqxx::connection c(CONN_STRING);
	pqxx::work txn{c};

	pqxx::result r = txn.exec(
			"DELETE FROM fitness_patterns_mnist ");

	txn.commit();

}


void DbHandler::clear_pareto_flag(int id) {

	pqxx::connection c(CONN_STRING);
	pqxx::work txn{c};

	pqxx::result r = txn.exec("UPDATE fitness_patterns_mnist SET pareto_front = FALSE WHERE id = " + txn.quote(id));

	txn.commit();

}


void DbHandler::set_pareto_flag(int id) {

	pqxx::connection c(CONN_STRING);
	pqxx::work txn{c};

	pqxx::result r = txn.exec("UPDATE fitness_patterns_mnist SET pareto_front = TRUE WHERE id = " + txn.quote(id));

	txn.commit();

}
