# Supplementary material for: An Experiment on the Use of Genetic Algorithms for Topology Selection in Deep Learning
Source: Hindawi journal article supplement (doi:10.1155/2019/3217542), 2019-01-15
Supplement: f1 [file 3217542.f1.zip › 3217542.f1/ga-dnn-mnist/src/mnist-classifier.h]

#ifndef MNIST_CLASSIFIER_H_
#define MNIST_CLASSIFIER_H_

#include "classifier.h"
#include "descriptors.h"
#include "mnist-data-wrapper.h"
#include <boost/date_time/posix_time/posix_time.hpp>
#include <boost/filesystem.hpp>
#include <boost/timer.hpp>
#include <caffe/caffe.hpp>
#include "ann-config.h"

using namespace caffe;
using namespace boost::filesystem;


class MnistClassifier : public Classifier<Pattern> {

public:
	MnistClassifier(const TopologyDescriptor &descriptor,
			boost::shared_ptr<MnistDataWrapper> &data_wrapper,
			int output_size,
			int batch_size,
			int max_epochs,
			int n_training_patterns,
			int n_test_patterns,
			int patience);

	MnistClassifier(boost::shared_ptr<MnistDataWrapper> &data_wrapper,
				int output_size,
				int batch_size,
				int max_epochs,
				int n_training_patterns,
				int n_test_patterns,
				int patience);

	MnistClassifier();

	virtual ~MnistClassifier();

	// Train the tracker
	void train();

	float train_with_batch(const vector<Pattern>& batch);

	// void classify(const Pattern& pattern, vector<float> &pred);

	void classify(const Pattern& pattern, int& pred);

	void classify(Pattern& pattern);

private:
	void add_input_layer();

	void add_softmax_loss_layer();

	boost::shared_ptr<MnistDataWrapper> data_wrapper;

};

#endif
