# Supplementary material for: An Experiment on the Use of Genetic Algorithms for Topology Selection in Deep Learning
Source: Hindawi journal article supplement (doi:10.1155/2019/3217542), 2019-01-15
Supplement: f1 [file 3217542.f1.zip › 3217542.f1/ga-dnn-mnist/src/test/mnist-classifier-test.cpp]

#include "../ann-config.h"
#include "../mnist-classifier.h"

#include <boost/test/unit_test.hpp>
#include <iostream>

using namespace std;


/*
 * Test the creation of a classifier
 */
void classifier_creation_test() {

	string descriptor = "CR;32;11;4;2-FR;16;0.5";

	TopologyDescriptor topology_descriptor(descriptor);

	BOOST_CHECK_EQUAL( topology_descriptor.to_string(), descriptor );

	boost::shared_ptr<MnistDataWrapper> data_wrapper(new MnistDataWrapper);

	MnistClassifier classifier(topology_descriptor,
			data_wrapper,
			N_CLASSES,
			BATCH_SIZE,
			MAX_EPOCHS,
			N_TRAIN_PATTERNS,
			N_TEST_PATTERNS,
			PATIENCE);

	BOOST_CHECK_EQUAL(12282, classifier.get_n_weights());

}
