# Supplementary material for: An Experiment on the Use of Genetic Algorithms for Topology Selection in Deep Learning
Source: Hindawi journal article supplement (doi:10.1155/2019/3217542), 2019-01-15
Supplement: f1 [file 3217542.f1.zip › 3217542.f1/ga-dnn-mnist/src/test/mnist-data-wrapper-test.cpp]

#include "../mnist-data-wrapper.h"

#include <boost/test/unit_test.hpp>
#include <iostream>

using namespace boost::unit_test;
using namespace std;


/*
 * Test the loading of train and test data
 */
void load_train_test_data() {

	MnistDataWrapper data_wrapper;

	pair<vector<Pattern>, vector<Pattern>> train_test_data = data_wrapper.load_train_test_data(1024, 256);

	BOOST_CHECK_EQUAL(1024, train_test_data.first.size());
	BOOST_CHECK_EQUAL(256, train_test_data.second.size());

}
