# Supplementary material for: An Experiment on the Use of Genetic Algorithms for Topology Selection in Deep Learning
Source: Hindawi journal article supplement (doi:10.1155/2019/3217542), 2019-01-15
Supplement: f1 [file 3217542.f1.zip › 3217542.f1/ga-dnn-mnist/src/test/solution-test.cpp]

#include "../solution.h"

#include <boost/test/unit_test.hpp>
#include <iostream>

using namespace std;


/*
 * Test the weight count of a solution
 */
void weight_count_test() {

	boost::shared_ptr<MnistDataWrapper> data_wrapper(new MnistDataWrapper());

	Solution s(data_wrapper, "CS;2;9;3;2");

	BOOST_CHECK_EQUAL(894, s.get_weights());

}


/*
 * Test the weight update after mutation
 */
void weight_count_after_mutation() {

	boost::shared_ptr<MnistDataWrapper> data_wrapper(new MnistDataWrapper());

	Solution s(data_wrapper, "CS;2;9;3;2");

	BOOST_CHECK_EQUAL(894, s.get_weights());

	s.mutate_conv();

	BOOST_CHECK_EQUAL(354, s.get_weights());

}
